# Supplementary material for: Gas7 Functions with N-WASP to Regulate the Neurite Outgrowth of Hippocampal Neurons
Source: PubMed Central journal article supplement — J Biol Chem. 2010 Feb 11;285(15):11652–66. doi: 10.1074/jbc.M109.051094 (PMC3283256; doi:10.1074/jbc.m109.051094), 2010-02-11

## SUPPLEMENTARY FIGURE LEGENDS

FIG. S1. **No morphological changes in N-WASP-transfected Neuro-2a cells.** Immunostaining of Neuro-2a cells transfected with HA/N-WASP, depicting cellular architecture. Scale bar: 10  $\mu$ m.

FIG. S2. **Distribution of Gas7 and N-WASP in cortex and cerebellum of adult mice brain.** Cortex (A) and cerebellum (B) sections were stained with antibodies to Gas7 and N-WASP. Hoechst, MAPII or calbindin staining was used to identify nuclei, neurons and Purkinje cells (Pk), respectively. The superimposed images show combined Gas7 (green) and N-WASP (red) staining, with regions of co-localization in yellow. Bottom right image of each set shows the Boxed area in the previous image magnified 20X. A, both Gas7 and N-WASP are expressed in cortical neurons; however, little subcellular co-localization of Gas7 and N-WASP can be detected. B, localization of Gas7 in the cerebellum is quite distinct from N-WASP in Purkinje cells. Scale bar: 100  $\mu$ m (5  $\mu$ m in magnified area). ML, molecular layer; GL, granular layer.

FIG. S3. **Actin architecture in Gas7-truncate-transfected Neuro-2a cells.** Immunostaining of Neuro-2a cells transfected with Gas7 variants (Gas7/Myc, Gas7 $\Delta$ WW/Myc, Gas7 $\Delta$ FCH/Myc, or Gas7 $\Delta$ coiled/Myc) to represent the distribution of actin in the cells. Gas7-transfected cells have membrane protrusions composed of actin filaments, whereas the Gas7-truncate transfected cells do not. Scale bar: 10  $\mu$ m.

FIG. S4. **Microtubule architecture in Gas7-truncate-transfected Neuro-2a cells.** Immunostaining of Neuro-2a cells transfected with Gas7 truncates (Gas7/Myc, Gas7 $\Delta$ WW/Myc, Gas7 $\Delta$ FCH/Myc, or Gas7 $\Delta$ coiled/Myc) showing the distribution of microtubules. Gas7-induced membrane protrusions in Neuro-2a cells are not a result of microtubule reorganization, and Gas7 truncates did not induce microtubule reorganization in Neuro-2a cells. Scale bar: 10  $\mu$ m.

FIG. S5. **Morphology of WW2/EGFP-transfected Neuro-2a cells.** Immunostaining of Neuro-2a cells transfected with WW2/EGFP to examine morphological changes. The WW2/EGFP-transfected Neuro-2a cells did not show any membrane protrusions. Scale bar: 10  $\mu$ m.

FIG. S6. **Gas7-cb is expressed mainly in the nucleus of cells.** Immunostaining of Neuro-2a cells transfected with mouse Gas7-cb showing the localization of Gas7-cb. Hoechst staining and phase-contrast images show the nucleus and general morphology, respectively. The superimposed images show

combined Gas7-*cb* (red) and Hoechst (green) staining, the regions of co-localization being yellow. Scale bar: 5  $\mu\text{m}$ .

**FIG. S7. Gas7 induces membrane invagination in the COS-7 cells.** Gas7/EGFP was transiently expressed in COS-7 cells and time-lapse recorded by Olympus DeltaVision microscopy (A), or immunostained for  $\alpha$ -tubulin (B, upper panel), actin (B, middle panel) and compared with membrane staining (B, lower panel), showing the cytoskeleton and membranes 24 h after transfection. DiIC<sub>16</sub>(3) (D384, Invitrogen) was used for membrane staining (the procedure was carried out as previously described in ref. 50). The tubular structures induced by Gas7 overexpression were highly co-localized with membrane in COS-7; not with actin or microtubule architecture. Gas7 induces membrane deformation in COS-7. Scale bar: A, 6  $\mu\text{m}$  (2  $\mu\text{m}$  in magnified area); B, 10  $\mu\text{m}$  (2  $\mu\text{m}$  in magnified area).

**FIG. S8. Co-localization of Gas7 and N-WASP in dendritic spines and synaptic vesicles of hippocampal neurons.** Immunostaining for Gas7 and N-WASP in primary culture of embryonic E16.5 mouse hippocampal neurons at 21 DIV. PSD95 and synaptophysin staining were used to identify dendritic spines and synaptic vesicles, respectively. Gas7 (green) and N-WASP (red) co-localized with PSD95 (arrows, A) and synaptophysin (arrows, B). Scale bar: 10  $\mu\text{m}$  (2  $\mu\text{m}$  in inset).

**FIG S1**

HA

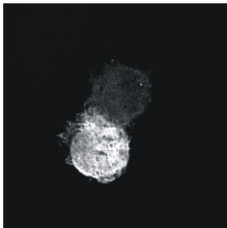

Hoechst

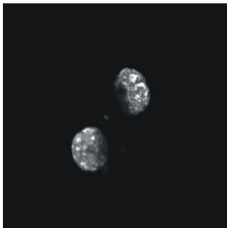

DIC

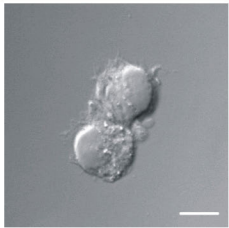

**FIG S2****A**

Immune Gas7 and N-WASP

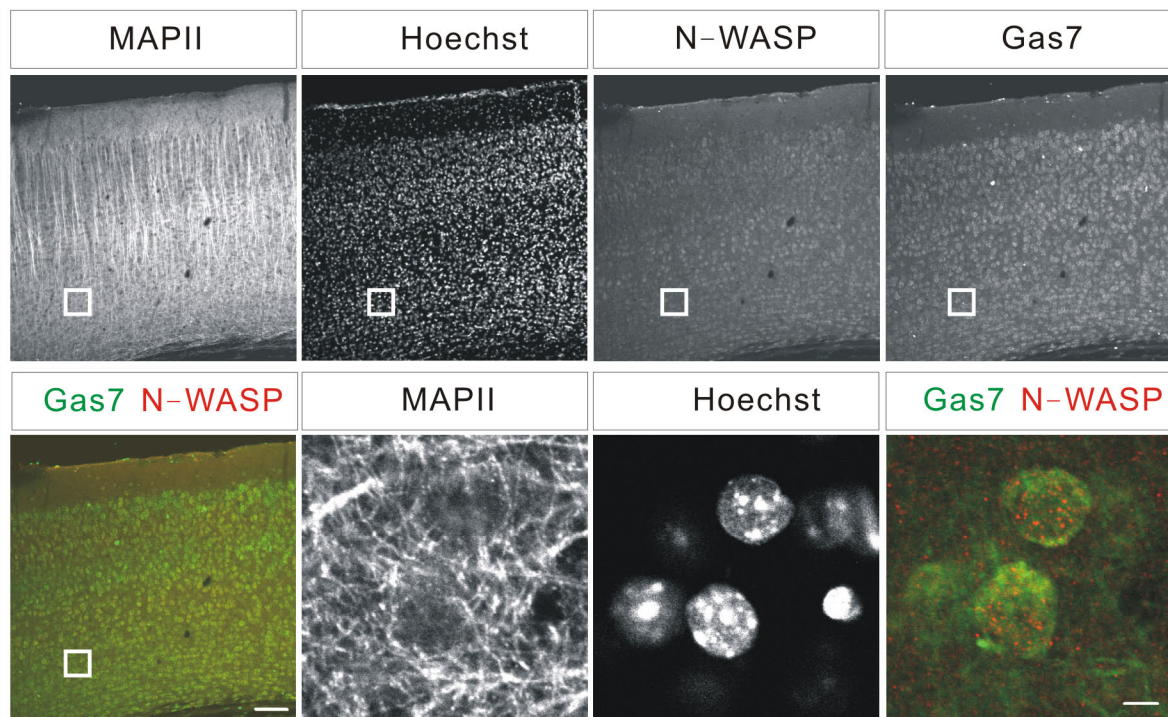

Gas7 and N-WASP Antigen Pre-absorbed

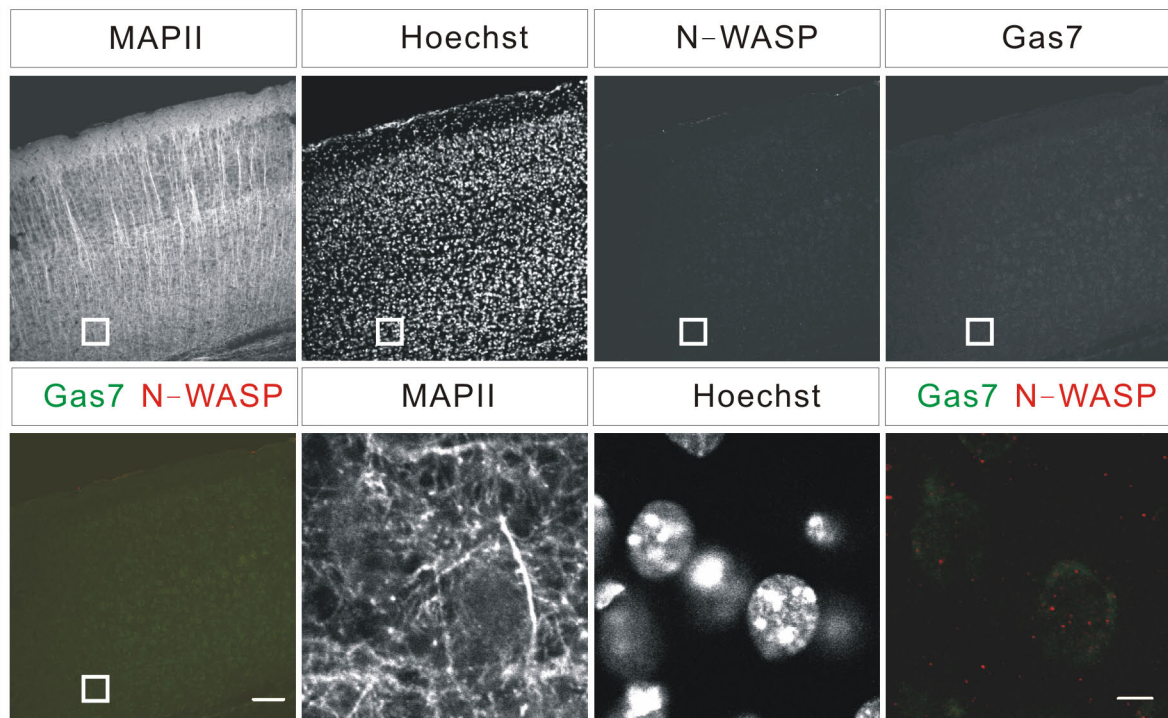

**FIG S2****B**

Immune Gas7 and N-WASP

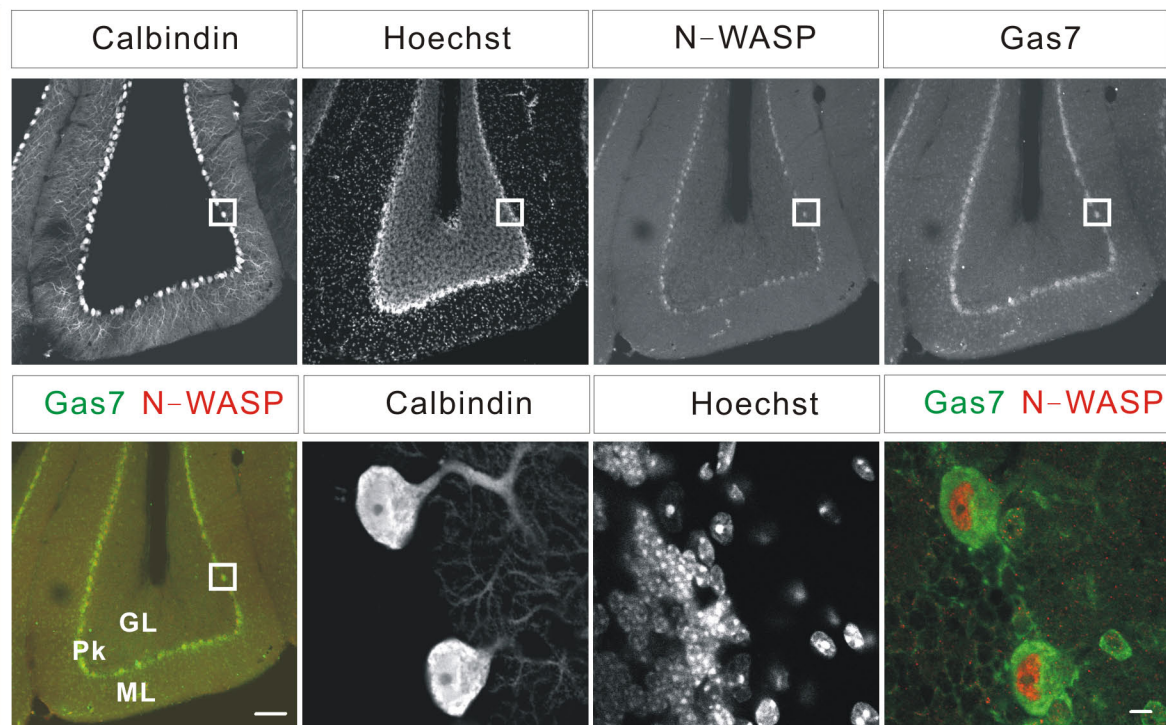

Gas7 and N-WASP Antigen Pre-absorbed

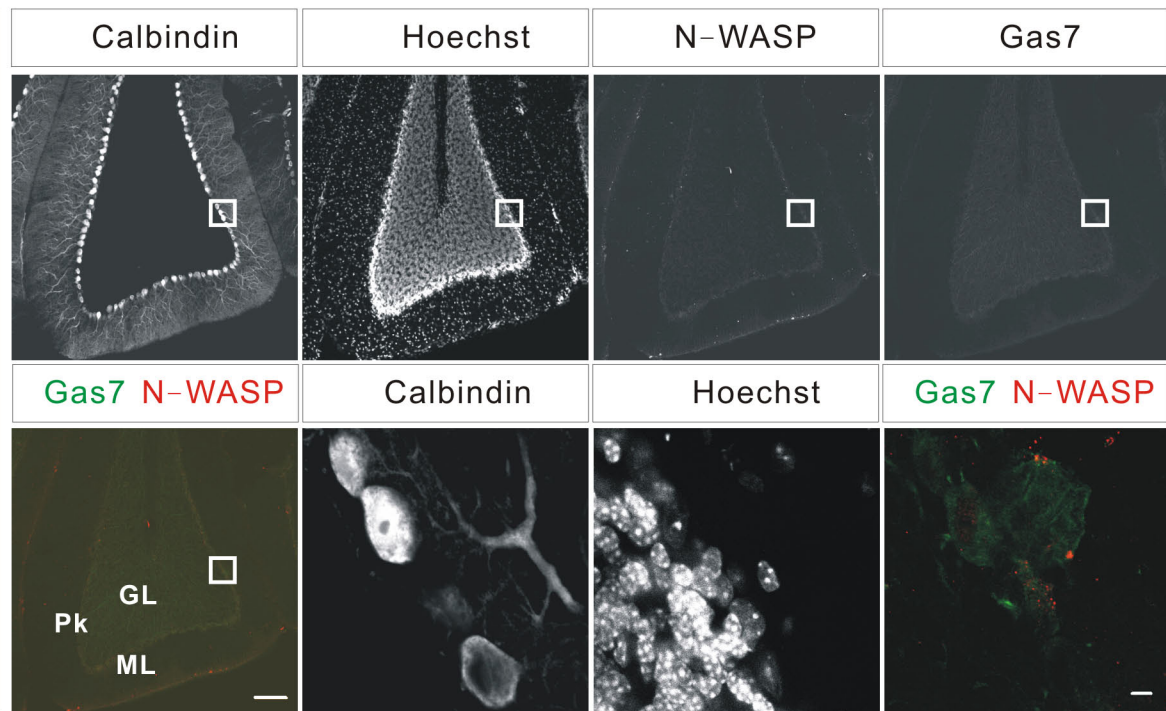

**FIG S3**

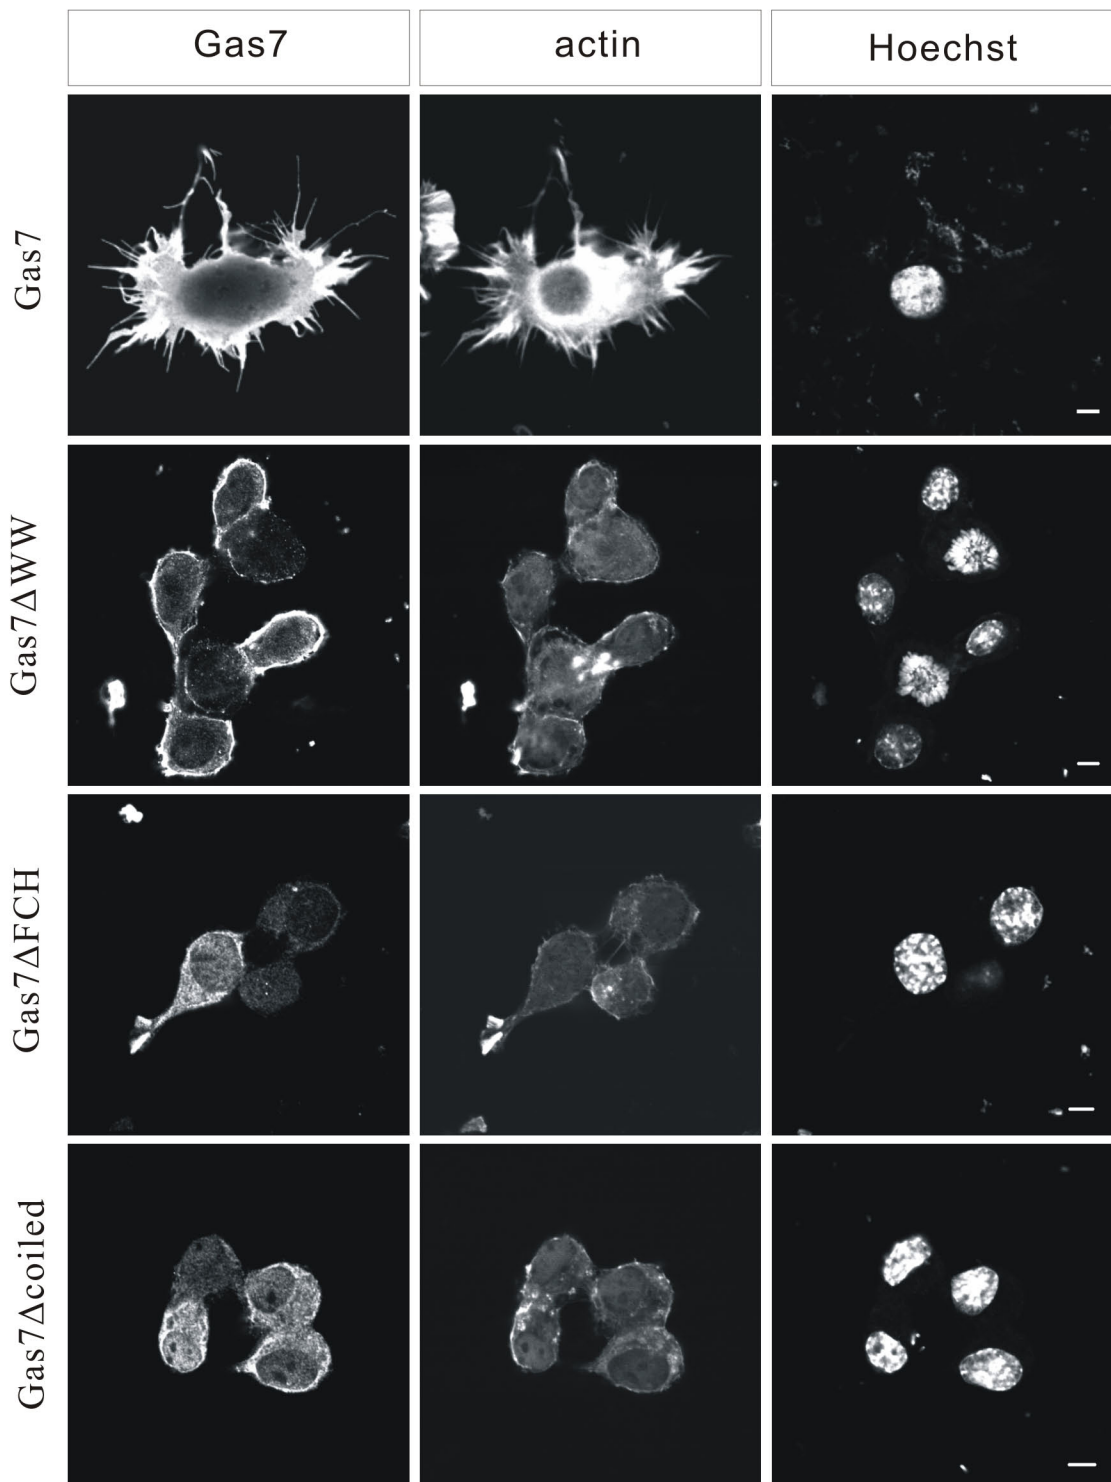

**FIG S4**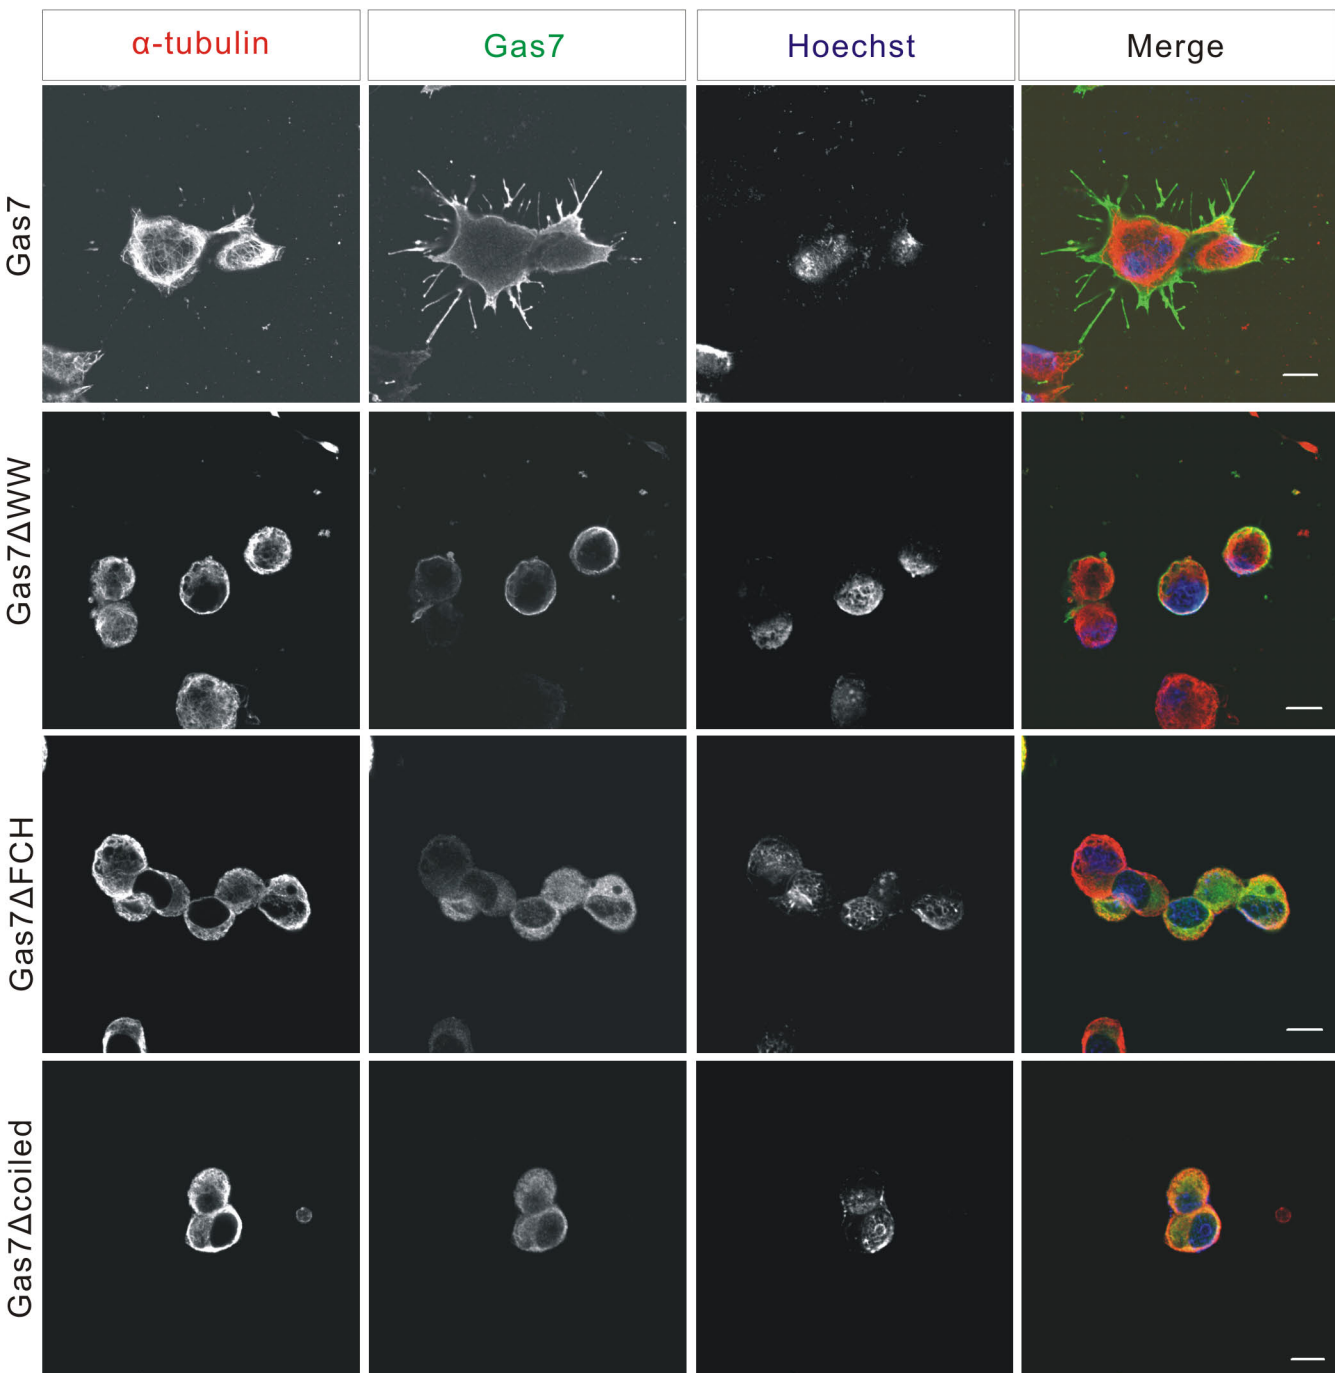

**FIG S5**

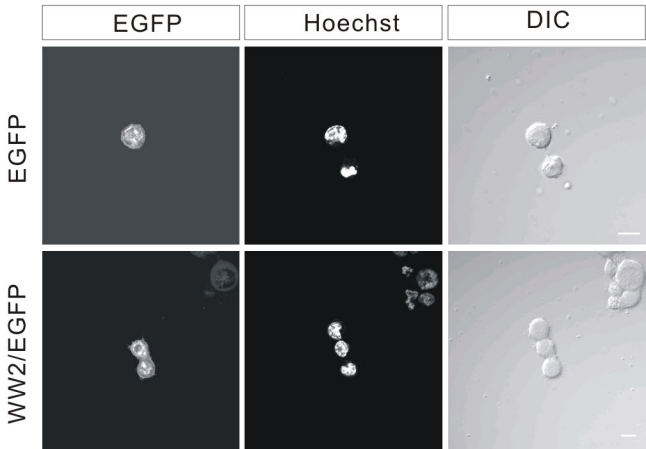



**FIG S6**

**Gas7-cb**

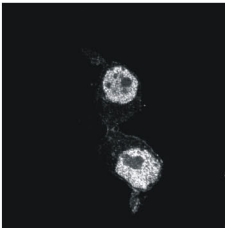

**Hoechst**

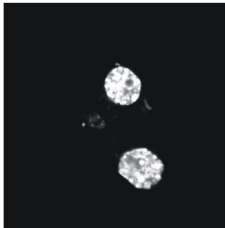

**Merge**

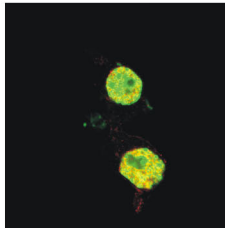

**Phase**

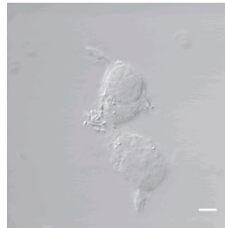

FIG S7

A

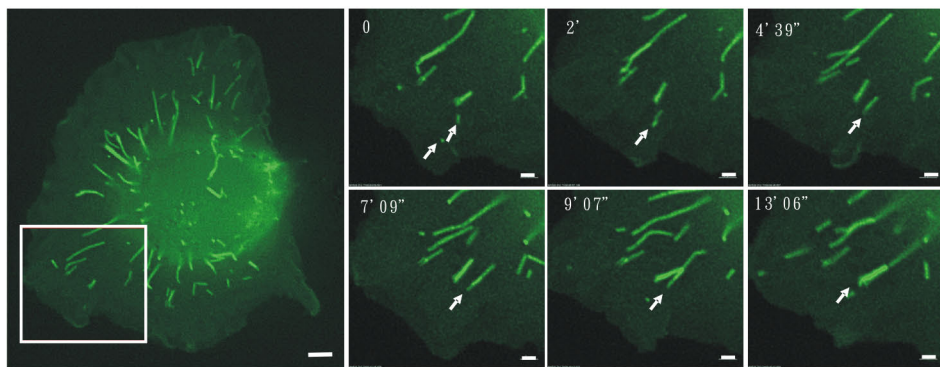

B

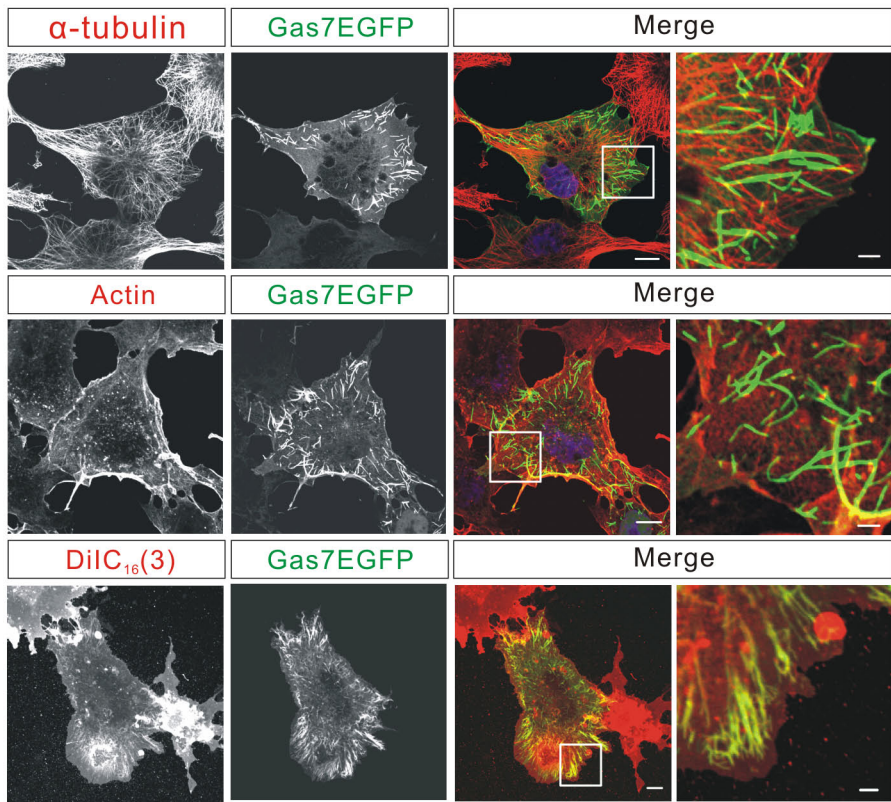

**FIG S8****A**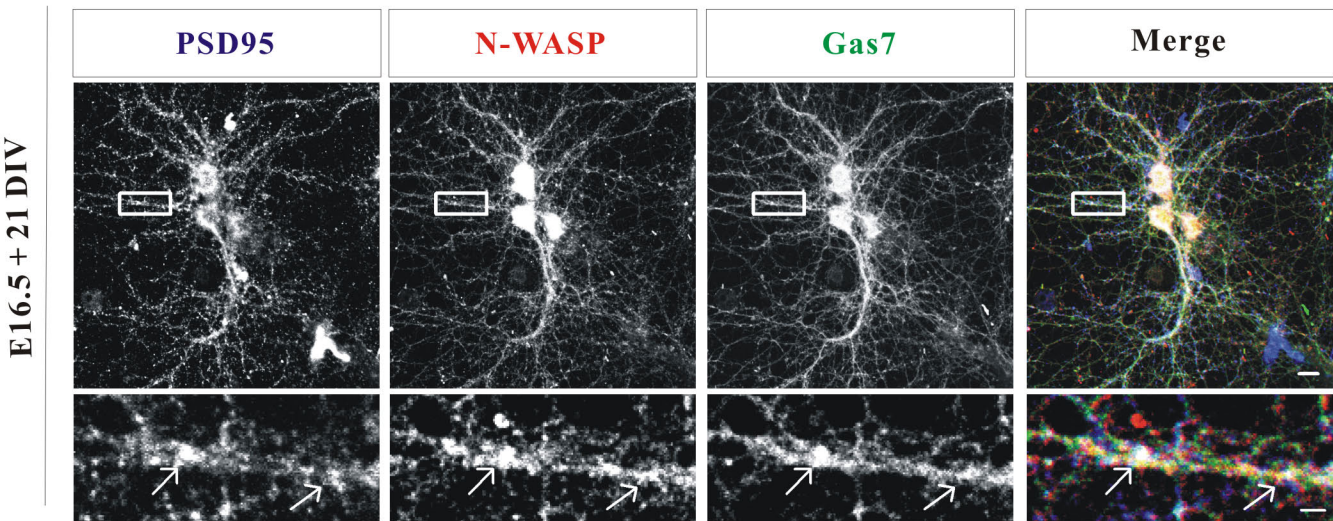**B**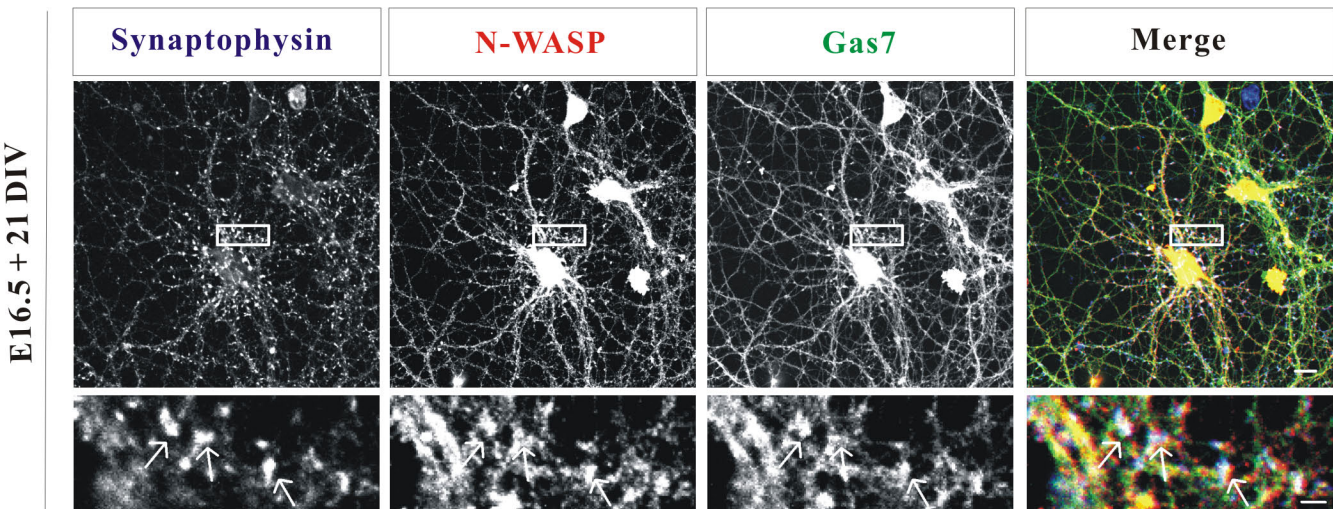

Supplement: supp_M109.051094_Supplementary.pdf [file supp_M109.051094_Supplementary.pdf]
